# Supplementary material
Source: PubMed Central journal article supplement (PMC4537355)

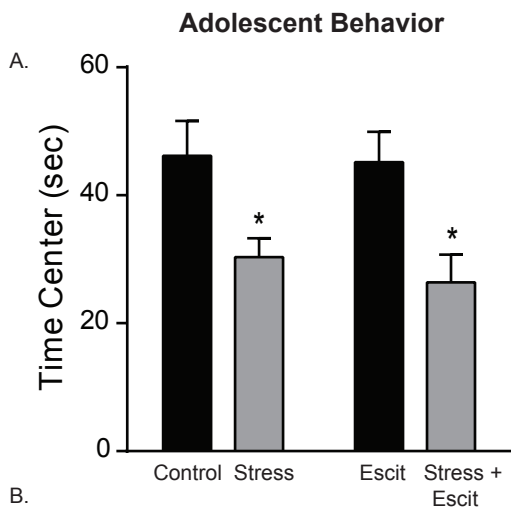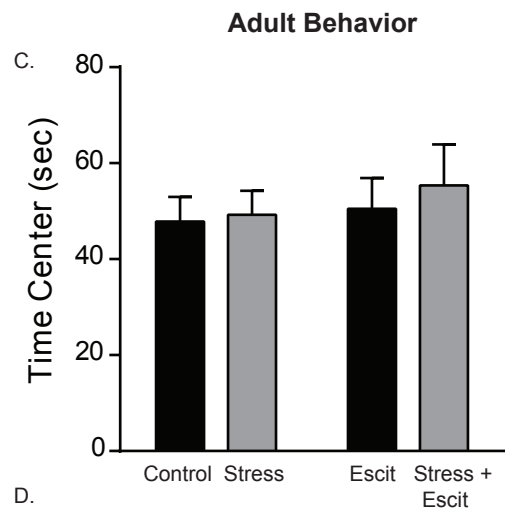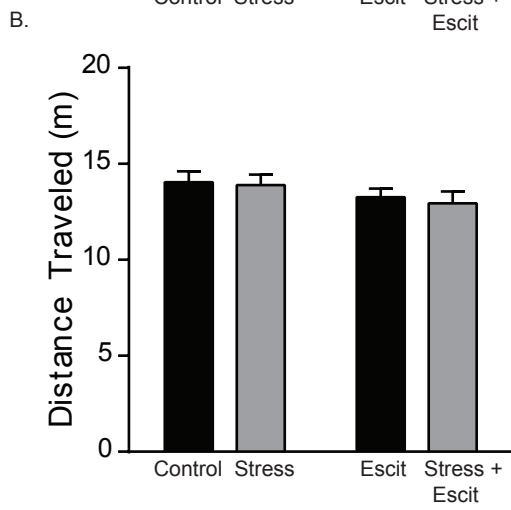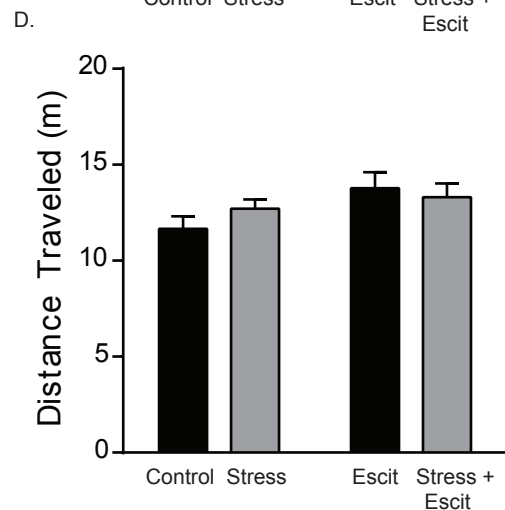

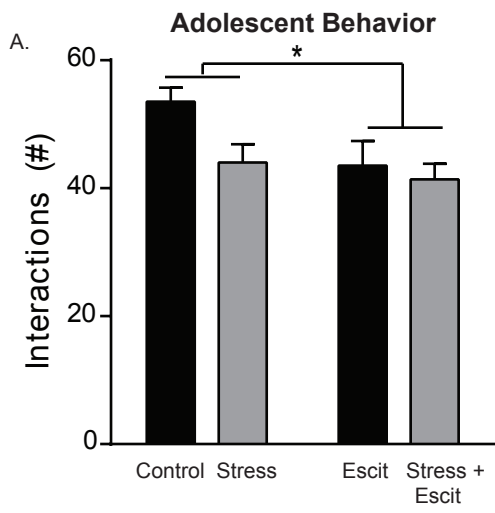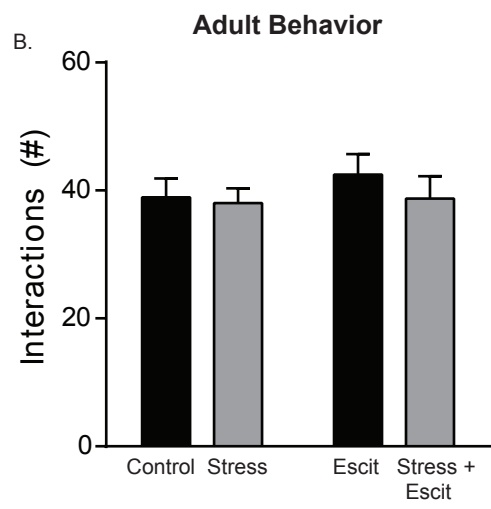

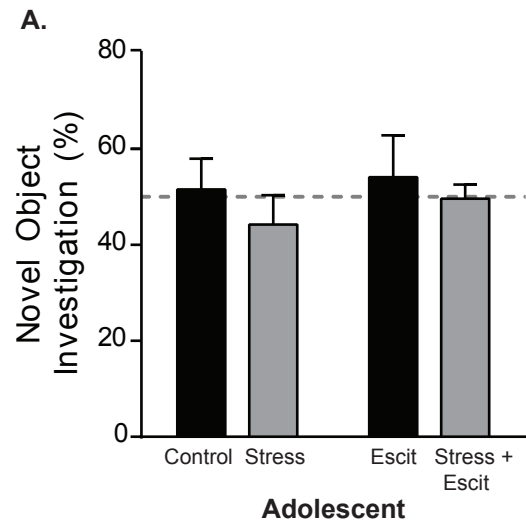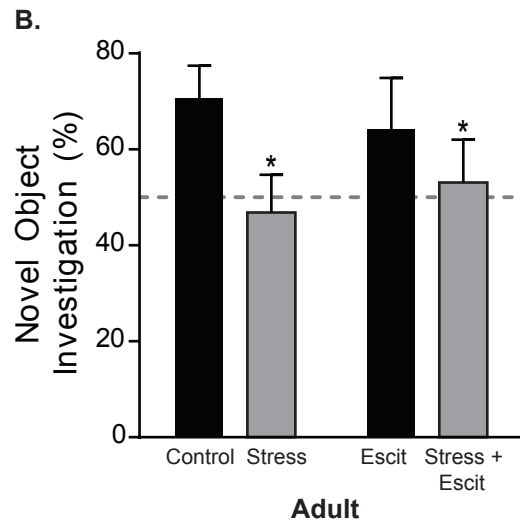

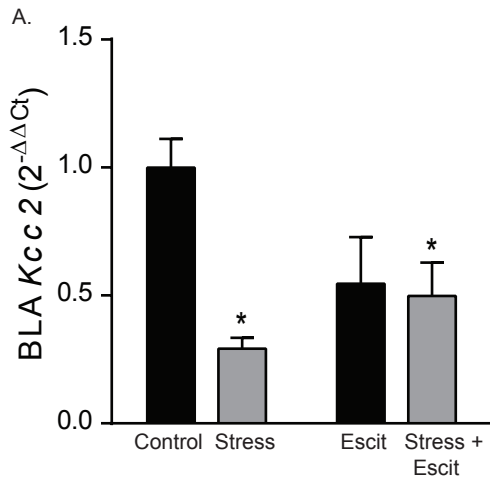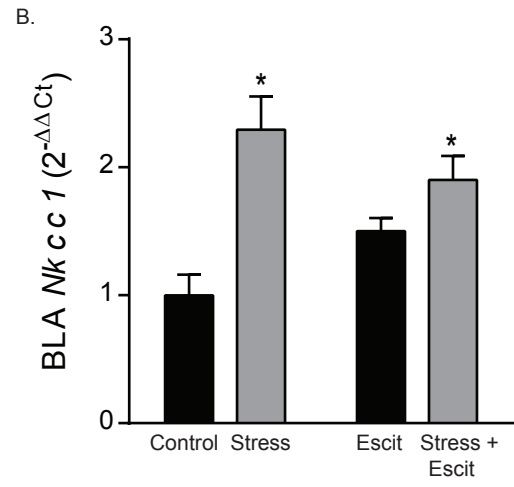

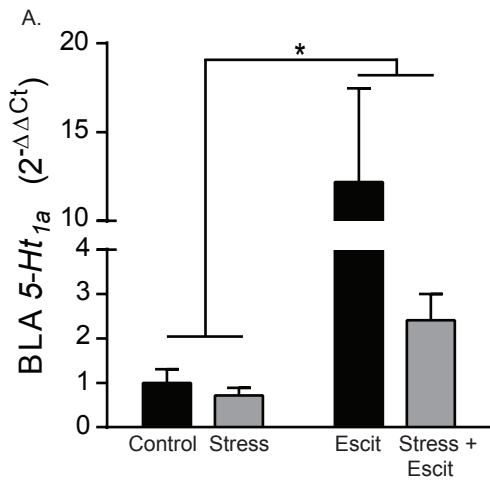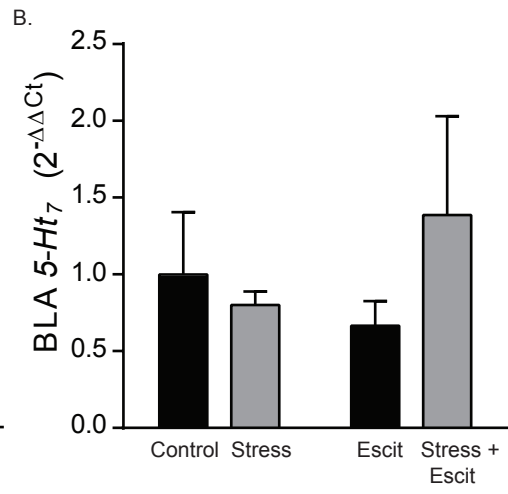

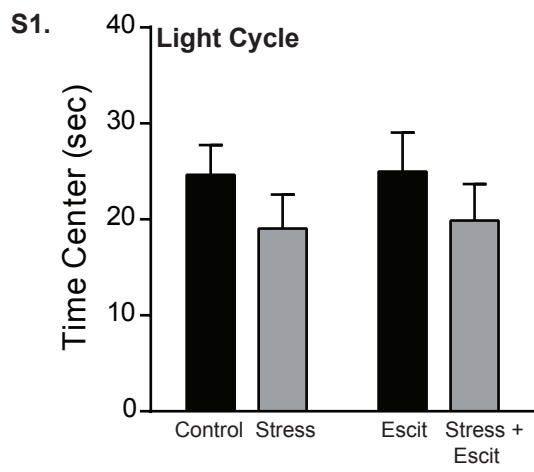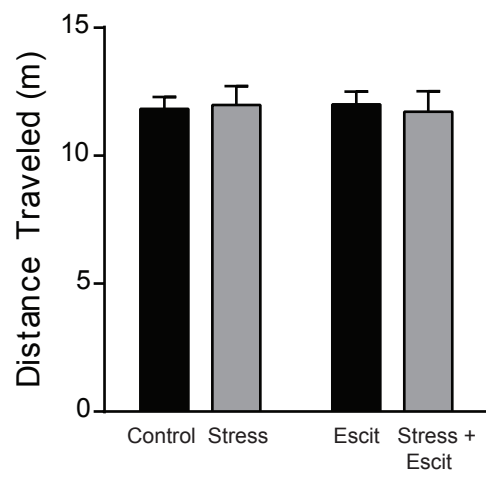

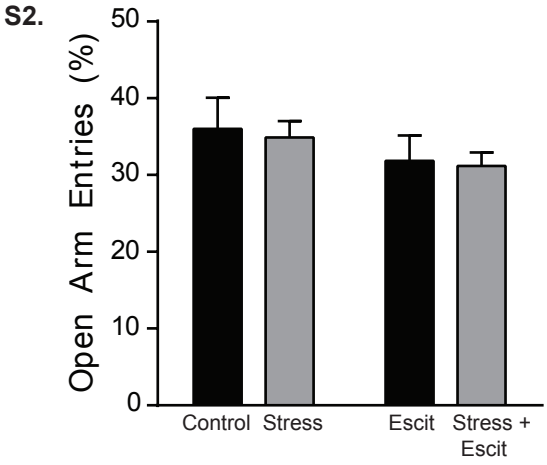

S3.

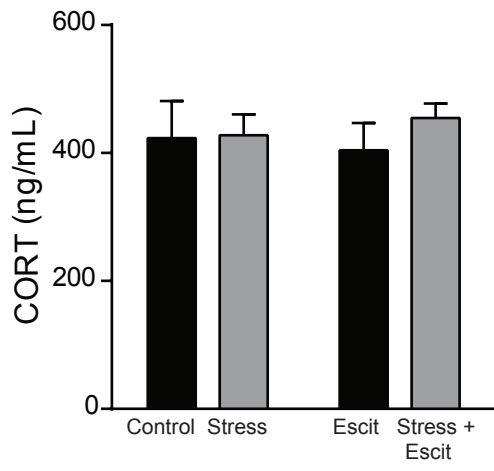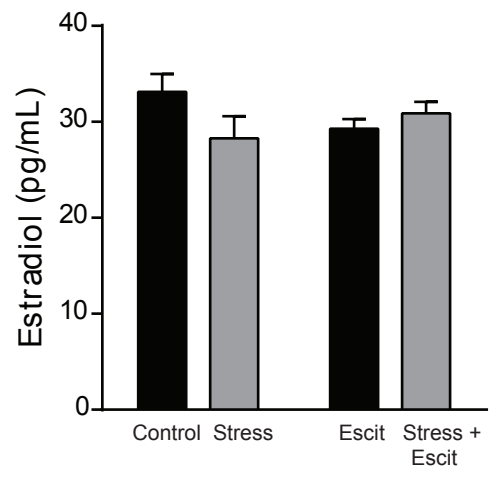

Supplement: NIHMS705481-supplement-1.pdf [file NIHMS705481-supplement-1.pdf]

Figure 1

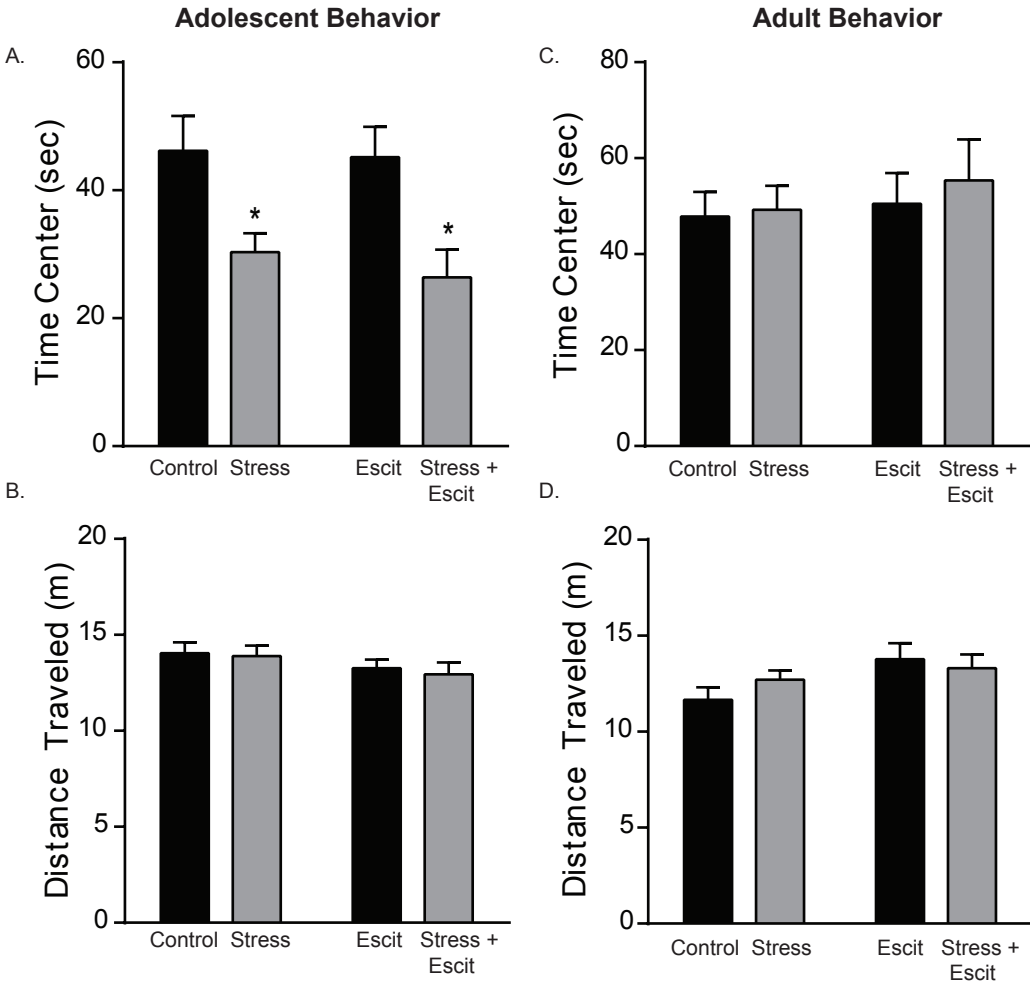

Figure 2

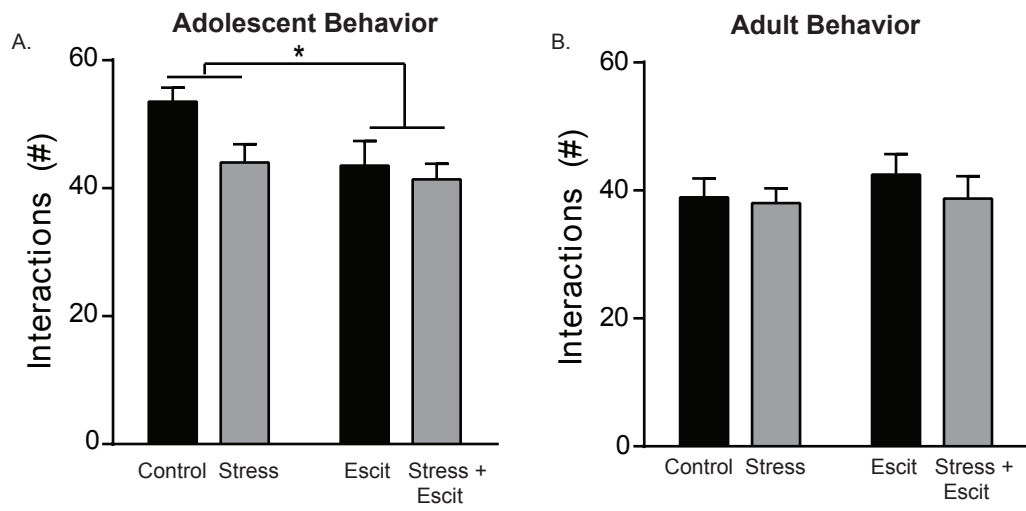

Figure 3

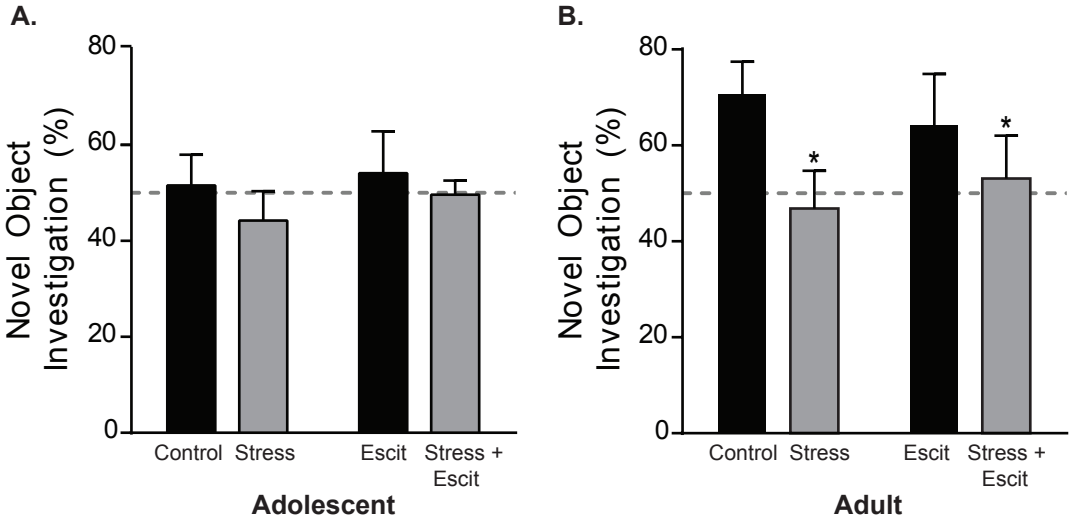

Figure 4

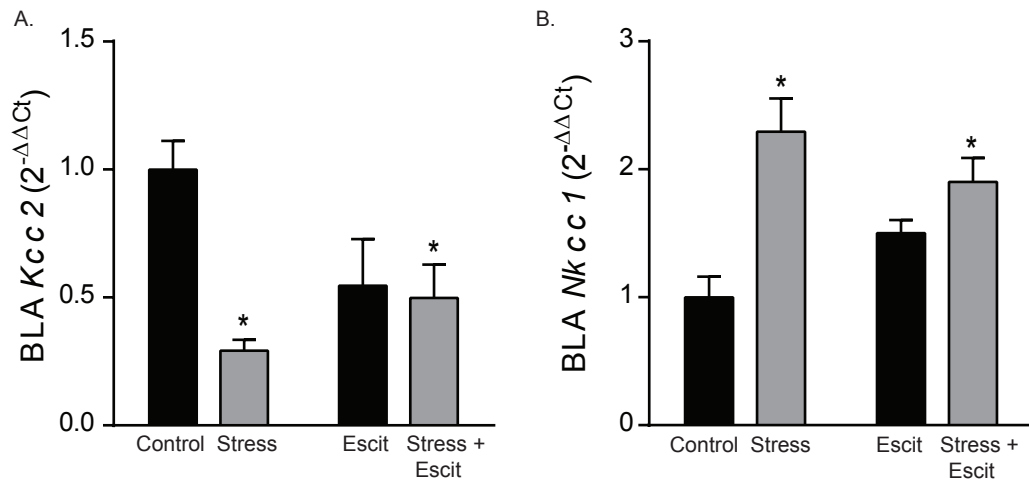

Figure 5

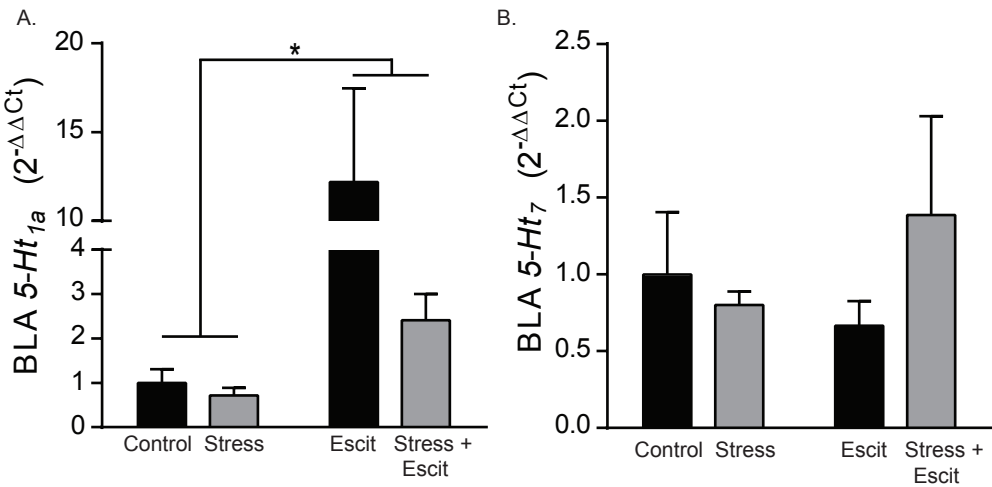

Figure S1

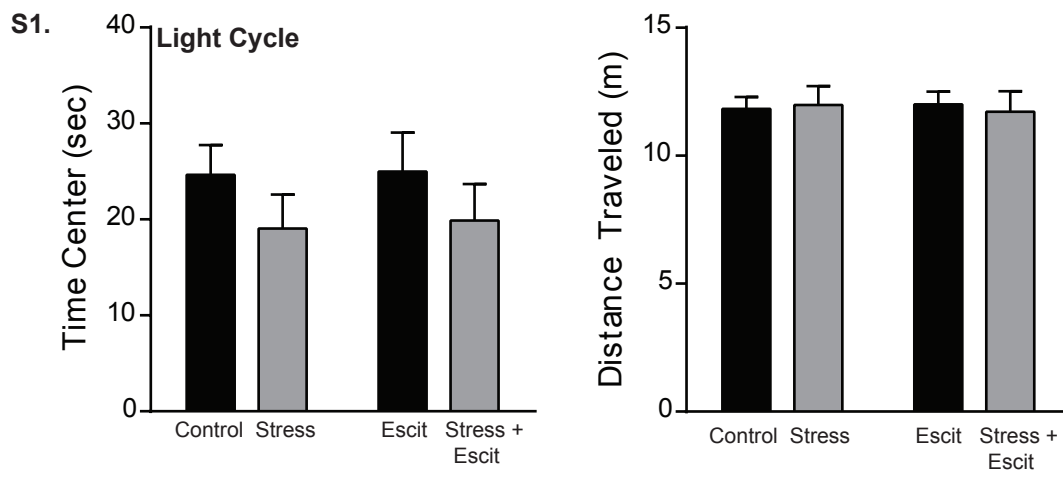

Figure S2

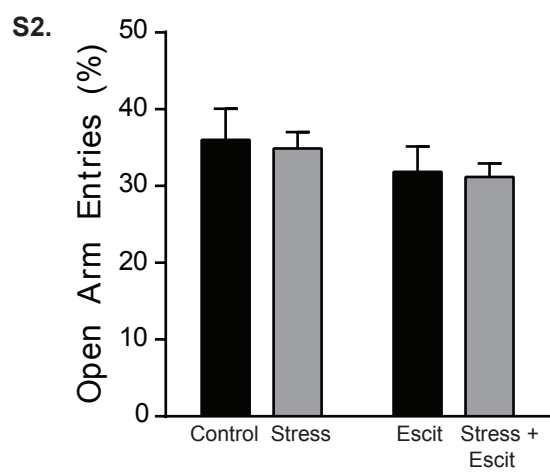

Figure S3

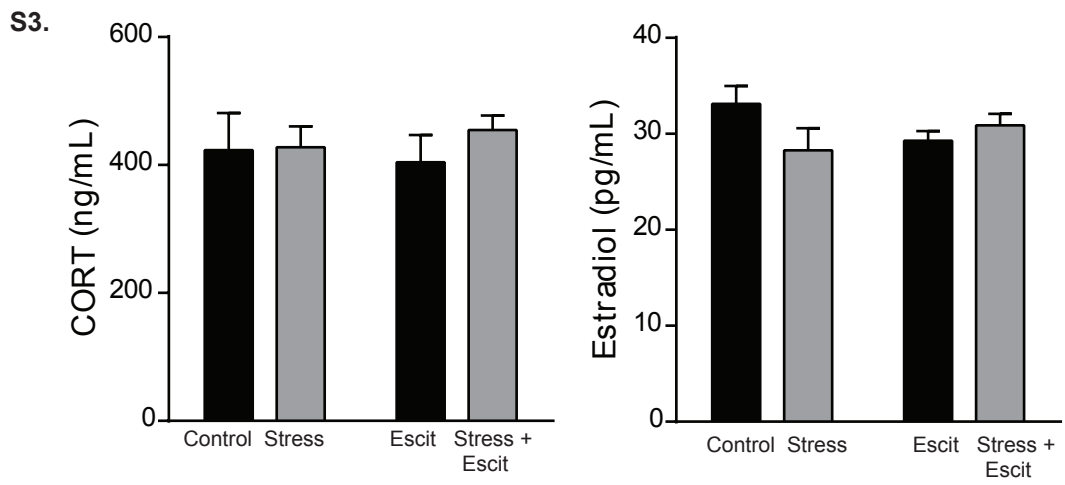

Supplement: NIHMS705481-supplement-2.pdf [file NIHMS705481-supplement-2.pdf]
